# Supplementary material for: Examining the Role of Interpersonal Violence in Racial Disparities in Breastfeeding in North Dakota (ND PRAMS 2017–2019)
Source: MDPI journal article supplement (doi:10.3390/ijerph20085445), 2023-04-09
Supplement: s1 [file s1]

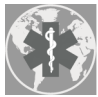

**Table S1.** Education variable removed from main breastfeeding initiation analyses.

|                           |                            | <u>Breastfeeding Initiation</u> |                         |       |                            |
|---------------------------|----------------------------|---------------------------------|-------------------------|-------|----------------------------|
|                           |                            | OR (95% CI)                     |                         |       |                            |
|                           |                            | American Indian                 | Other Racial Identities | White | Violence Variable Estimate |
| Crude Model               |                            | 0.24<br>(0.18, 0.31)            | 0.87<br>(0.49, 1.52)    | Ref.  | -                          |
| Sociodemographic Model    |                            | 0.55<br>(0.37, 82)              | 1.09<br>(0.58, 2.06)    | Ref.  | -                          |
| Violence Before Pregnancy | Any Interpersonal Violence | 0.54<br>(0.37, 0.81)            | 1.11<br>(0.59, 2.08)    | Ref.  | 0.36<br>(0.10, 1.28)       |
|                           | Husband/Partner            | 0.55<br>(0.37, 0.82)            | 1.09<br>(0.58, 2.06)    | Ref.  | 0.95<br>(0.37, 2.42)       |
|                           | Ex- Husband/Partner        | 0.55<br>(0.37, 0.82)            | 1.09<br>((0.58, 2.06)   | Ref.  | 0.97<br>(0.35, 2.66)       |
|                           | Other Family               | 0.56<br>(0.37, 0.83)            | 1.10<br>(0.58, 2.06)    | Ref.  | 0.65<br>(0.22, 1.89)       |
|                           | Other                      | 0.55<br>(0.37, 0.81)            | 1.09<br>(0.58, 2.06)    | Ref.  | 0.46<br>(0.18, 1.20)       |
| Violence During Pregnancy | Any Interpersonal Violence | 0.55<br>(0.37, 0.82)            | 1.09<br>(0.58, 2.07)    | Ref.  | 0.66<br>(0.18, 2.34)       |
|                           | Husband/Partner            | 0.54<br>(0.36, 0.81)            | 1.08<br>(0.57, 2.05)    | Ref.  | 1.34<br>(0.52, 3.47)       |
|                           | Ex- Husband/Partner        | 0.55<br>(0.37, 0.81)            | 1.09<br>(0.58, 2.06)    | Ref.  | 1.41<br>(0.46, 4.37)       |
|                           | Other Family               | 0.55<br>(0.37, 0.82)            | 1.09<br>(0.58, 2.06)    | Ref.  | 0.85<br>(0.33, 2.19)       |
|                           | Other                      | 0.55<br>(0.37, 0.81)            | 1.09<br>(0.58, 2.06)    | Ref.  | 1.23<br>(0.42, 3.59)       |

Adjusted for race, income, insurance before pregnancy, maternal age, substance use, marital status, pregnancy intention, chronic disease, overweight/obese, WIC, Kotelchuck, and ACEs.

**Table S2.** Income variable removed from main breastfeeding initiation analyses.

| <u>Breastfeeding Initiation</u> |                            |                         |                      |                            |                      |
|---------------------------------|----------------------------|-------------------------|----------------------|----------------------------|----------------------|
| OR (95% CI)                     |                            |                         |                      |                            |                      |
|                                 | American Indian            | Other Racial Identities | White                | Violence Variable Estimate |                      |
| Crude Model                     |                            | 0.24<br>(0.18, 0.31)    | 0.87<br>(0.49, 1.52) | Ref.                       | -                    |
| Sociodemographic Model          |                            | 0.52<br>(0.35, 0.78)    | 1.02<br>(0.54, 1.93) | Ref.                       | -                    |
| Violence Before Pregnancy       | Any Interpersonal Violence | 0.52<br>(0.35, 0.77)    | 1.04<br>(0.55, 1.97) | Ref.                       | 0.38<br>(0.10, 1.36) |
|                                 | Husband/Partner            | 0.52<br>(0.35, 0.78)    | 1.02<br>(0.54, 1.93) | Ref.                       | 0.94<br>(0.37, 2.36) |
|                                 | Ex- Husband/Partner        | 0.52<br>(0.35, 0.78)    | 1.02<br>(0.54, 1.93) | Ref.                       | 0.94<br>(0.35, 2.47) |
|                                 | Other Family               | 0.53<br>(0.35, 0.79)    | 1.03<br>(0.54, 1.94) | Ref.                       | 0.67<br>(0.23, 1.92) |
|                                 | Other                      | 0.52<br>(0.35, 0.78)    | 1.03<br>(0.54, 1.94) | Ref.                       | 0.48<br>(0.8, 1.31)  |
| Violence During Pregnancy       | Any Interpersonal Violence | 0.52<br>(0.35, 0.78)    | 1.02<br>(0.54, 1.94) | Ref.                       | 0.77<br>(0.20, 2.85) |
|                                 | Husband/Partner            | 0.52<br>(0.34, 0.77)    | 1.02<br>(0.54, 1.92) | Ref.                       | 1.37<br>(0.53, 3.50) |
|                                 | Ex- Husband/Partner        | 0.52<br>(0.35, 0.78)    | 1.02<br>(0.54, 1.93) | Ref.                       | 1.30<br>(0.45, 3.69) |
|                                 | Other Family               | 0.52<br>(0.35, 0.78)    | 1.02<br>(0.54, 1.93) | Ref.                       | 0.86<br>(0.34, 2.21) |
|                                 | Other                      | 0.52<br>(0.35, 0.78)    | 1.02<br>(0.54, 1.93) | Ref.                       | 1.26<br>(0.43, 3.71) |

Adjusted for race, insurance before pregnancy, maternal age, education, substance use, marital status, pregnancy intention, chronic disease, overweight/obese, WIC, Kotelchuck, and ACEs.

**Table S3.** Education variable removed from main 2 month breastfeeding duration analyses.

| <b>Breastfeeding Duration – 2 Months</b> |                                   |                                |                      |                                   |
|------------------------------------------|-----------------------------------|--------------------------------|----------------------|-----------------------------------|
| <b>OR (95% CI)</b>                       |                                   |                                |                      |                                   |
|                                          | <b>American Indian</b>            | <b>Other Racial Identities</b> | <b>White</b>         | <b>Violence Variable Estimate</b> |
| <b>Crude Model</b>                       | 0.30<br>(0.25, 0.36)              | 1.08<br>(0.75, 1.57)           | Ref.                 | -                                 |
| <b>Sociodemographic Model</b>            | 0.70<br>(0.53, 0.93)              | 1.23<br>(0.76, 1.99)           | Ref.                 | -                                 |
| <b>Violence Before Pregnancy</b>         | <b>Any Interpersonal Violence</b> | 0.70<br>(0.52, 0.93)           | 1.25<br>(0.77, 2.02) | Ref.<br>0.35<br>(0.07, 1.56)      |
|                                          | <b>Husband/Partner</b>            | 0.72<br>(0.54, 0.96)           | 1.24<br>(0.77, 2.01) | Ref.<br>0.60<br>(0.23, 1.53)      |
|                                          | <b>Ex- Husband/Partner</b>        | 0.70<br>(0.53, 0.94)           | 1.24<br>(0.77, 2.00) | Ref.<br>0.69<br>(0.30, 1.60)      |
|                                          | <b>Other Family</b>               | 0.72<br>(0.54, 0.96)           | 1.24<br>(0.77, 2.01) | Ref.<br>0.44<br>(0.13, 1.41)      |
|                                          | <b>Other</b>                      | 0.70<br>(0.53, 0.93)           | 1.24<br>(0.77, 1.99) | Ref.<br>0.47<br>(0.18, 1.18)      |
| <b>Violence During Pregnancy</b>         | <b>Any Interpersonal Violence</b> | 0.71<br>(0.53, 0.94)           | 1.25<br>(0.77, 2.03) | Ref.<br>0.22<br>(0.05, 1.02)      |
|                                          | <b>Husband/Partner</b>            | 0.72<br>(0.54, 0.96)           | 1.25<br>(0.78, 2.03) | Ref.<br>0.50<br>(0.20, 1.24)      |
|                                          | <b>Ex- Husband/Partner</b>        | 0.71<br>(0.53, 0.94)           | 1.24<br>(0.77, 2.00) | Ref.<br>0.47<br>(0.18, 1.22)      |
|                                          | <b>Other Family</b>               | 0.72<br>(0.54, 0.96)           | 1.24<br>(0.77, 2.00) | Ref.<br>0.50<br>(0.16, 1.53)      |
|                                          | <b>Other</b>                      | 0.70<br>(0.53, 0.94)           | 1.23<br>(0.76, 1.99) | Ref.<br>0.60<br>(0.22, 1.58)      |

Adjusted for race, income, insurance before pregnancy, maternal age, substance use, marital status, pregnancy intention, chronic disease, overweight/obese, WIC, Kotelchuck, and ACEs.

**Table S4.** Income variable removed from main 2 month breastfeeding duration analyses.

| <b>Breastfeeding Duration – 2 Months</b> |                                   |                                |                      |                                   |
|------------------------------------------|-----------------------------------|--------------------------------|----------------------|-----------------------------------|
| <b>OR (95% CI)</b>                       |                                   |                                |                      |                                   |
|                                          | <b>American Indian</b>            | <b>Other Racial Identities</b> | <b>White</b>         | <b>Violence Variable Estimate</b> |
| <b>Crude Model</b>                       | 0.30<br>(0.25, 0.36)              | 1.08<br>(0.75, 1.57)           | Ref.                 | -                                 |
| <b>Sociodemographic Model</b>            | 0.68<br>(0.51, 0.90)              | 1.18<br>(0.73, 1.89)           | Ref.                 | -                                 |
| <b>Violence Before Pregnancy</b>         | <b>Any Interpersonal Violence</b> | 0.68<br>(0.51, 0.90)           | 1.19<br>(0.74, 1.92) | Ref.<br>0.35<br>(0.08, 1.52)      |
|                                          | <b>Husband/Partner</b>            | 0.70<br>(0.52, 0.93)           | 1.19<br>(0.74, 1.91) | Ref.<br>0.59<br>(0.23, 1.48)      |
|                                          | <b>Ex- Husband/Partner</b>        | 0.68<br>(0.51, 0.90)           | 1.18<br>(0.74, 1.91) | Ref.<br>0.68<br>(0.28, 1.59)      |
|                                          | <b>Other Family</b>               | 0.69<br>(0.52, 0.92)           | 1.19<br>(0.74, 1.91) | Ref.<br>0.44<br>(0.14, 1.39)      |
|                                          | <b>Other</b>                      | 0.68<br>(0.51, 0.90)           | 1.18<br>(0.73, 1.90) | Ref.<br>0.47<br>(0.18, 1.20)      |
| <b>Violence During Pregnancy</b>         | <b>Any Interpersonal Violence</b> | 0.68<br>(0.51, 0.91)           | 1.19<br>(0.74, 1.92) | Ref.<br>0.23<br>(0.05, 1.09)      |
|                                          | <b>Husband/Partner</b>            | 0.69<br>(0.52, 0.92)           | 1.19<br>(0.74, 1.92) | Ref.<br>0.50<br>(0.20, 1.25)      |
|                                          | <b>Ex- Husband/Partner</b>        | 0.69<br>(0.52, 0.91)           | 1.18<br>(0.74, 1.90) | Ref.<br>0.44<br>(0.17, 1.14)      |
|                                          | <b>Other Family</b>               | 0.69<br>(0.52, 0.92)           | 1.18<br>(0.74, 1.90) | Ref.<br>0.49<br>(0.16, 1.49)      |
|                                          | <b>Other</b>                      | 0.68<br>(0.51, 0.90)           | 1.18<br>(0.73, 1.89) | Ref.<br>0.59<br>(0.22, 1.55)      |

Adjusted for race, insurance before pregnancy, maternal age, education, substance use, marital status, pregnancy intention, chronic disease, overweight/obese, WIC, Kotelchuck, and ACEs.

**Table S5.** Education variable removed from main 6 month breastfeeding duration analyses.

| <b>Breastfeeding Duration – 6 Months</b> |                                   |                                |              |                                   |
|------------------------------------------|-----------------------------------|--------------------------------|--------------|-----------------------------------|
| <b>OR (95% CI)</b>                       |                                   |                                |              |                                   |
|                                          | <b>American Indian</b>            | <b>Other Racial Identities</b> | <b>White</b> | <b>Violence Variable Estimate</b> |
| <b>Crude Model</b>                       | 0.24<br>(0.20, 0.29)              | 0.87<br>(0.62, 1.23)           | Ref.         | -                                 |
| <b>Sociodemographic Model</b>            | 0.62<br>(0.46, 0.83)              | 0.88<br>(0.56, 1.36)           | Ref.         | -                                 |
| <b>Violence Before Pregnancy</b>         | <b>Any Interpersonal Violence</b> | 0.62<br>(0.46, 0.83)           | Ref.         | 0.58<br>(0.11, 3.00)              |
|                                          | <b>Husband/Partner</b>            | 0.63<br>(0.47, 0.84)           | Ref.         | 0.69<br>(0.24, 1.98)              |
|                                          | <b>Ex- Husband/Partner</b>        | 0.62<br>(0.46, 0.83)           | Ref.         | 0.47<br>(0.18, 1.20)              |
|                                          | <b>Other Family</b>               | 0.63<br>(0.47, 1.37)           | Ref.         | 0.47<br>(0.12, 1.76)              |
|                                          | <b>Other</b>                      | 0.62<br>(0.46, 0.83)           | Ref.         | 0.69<br>(0.25, 1.93)              |
| <b>Violence During Pregnancy</b>         | <b>Any Interpersonal Violence</b> | 0.62<br>(0.47, 0.83)           | Ref.         | 0.33<br>(0.06, 1.72)              |
|                                          | <b>Husband/Partner</b>            | 0.63<br>(0.47, 0.84)           | Ref.         | 0.54<br>(0.20, 1.43)              |
|                                          | <b>Ex- Husband/Partner</b>        | 0.62<br>(0.47, 0.83)           | Ref.         | 0.74<br>(0.26, 2.11)              |
|                                          | <b>Other Family</b>               | 0.63<br>(0.47, 0.84)           | Ref.         | 0.70<br>(0.20, 2.45)              |
|                                          | <b>Other</b>                      | 0.62<br>(0.47, 0.83)           | Ref.         | 0.65<br>(0.23, 1.81)              |

Adjusted for race, income, insurance before pregnancy, maternal age, substance use, marital status, pregnancy intention, chronic disease, overweight/obese, WIC, Kotelchuck, and ACEs.

**Table S6.** Income variable removed from main 6 month breastfeeding duration analyses.

| <b>Breastfeeding Duration – 6 Months</b> |                                   |                                |              |                                   |
|------------------------------------------|-----------------------------------|--------------------------------|--------------|-----------------------------------|
| <b>OR (95% CI)</b>                       |                                   |                                |              |                                   |
|                                          | <b>American Indian</b>            | <b>Other Racial Identities</b> | <b>White</b> | <b>Violence Variable Estimate</b> |
| <b>Crude Model</b>                       | 0.24<br>(0.20, 0.29)              | 0.87<br>(0.62, 1.23)           | Ref.         | -                                 |
| <b>Sociodemographic Model</b>            | 0.58<br>(0.44, 0.77)              | 0.79<br>(0.51, 1.22)           | Ref.         | -                                 |
| <b>Violence Before Pregnancy</b>         | <b>Any Interpersonal Violence</b> | 0.58<br>(0.43, 0.77)           | Ref.         | 0.58<br>(0.12, 2.80)              |
|                                          | <b>Husband/Partner</b>            | 0.59<br>(0.44, 0.78)           | Ref.         | 0.67<br>(0.24, 1.85)              |
|                                          | <b>Ex- Husband/Partner</b>        | 0.58<br>(0.43, 0.77)           | Ref.         | 0.45<br>(0.18, 1.13)              |
|                                          | <b>Other Family</b>               | 0.59<br>(0.44, 0.79)           | Ref.         | 0.46<br>(0.13, 1.65)              |
|                                          | <b>Other</b>                      | 0.58<br>(0.43, 0.77)           | Ref.         | 0.69<br>(0.24, 1.92)              |
| <b>Violence During Pregnancy</b>         | <b>Any Interpersonal Violence</b> | 0.58<br>(0.44, 0.77)           | Ref.         | 0.36<br>(0.06, 1.90)              |
|                                          | <b>Husband/Partner</b>            | 0.59<br>(0.44, 0.78)           | Ref.         | 0.54<br>(0.20, 1.45)              |
|                                          | <b>Ex- Husband/Partner</b>        | 0.58<br>(0.44, 0.77)           | Ref.         | 0.67<br>(0.24, 1.87)              |
|                                          | <b>Other Family</b>               | 0.59<br>(0.44, 0.78)           | Ref.         | 0.69<br>(0.21, 2.32)              |

Adjusted for race, insurance before pregnancy, maternal age, education, substance use, marital status, pregnancy intention, chronic disease, overweight/obese, WIC, Kotelchuck, and ACEs.
